# Supplementary material for: Feeding type and development drive the ingestion of microplastics by freshwater invertebrates
Source: Springer Nature journal article supplement (doi:10.1038/s41598-017-17191-7), 2017-11-29
Supplement: MOESM1 [file 41598_2017_17191_MOESM1_ESM.pdf]

1 **Supplementary Information**

2 **Feeding type and development drive the ingestion of microplastics by freshwater**  
3 **invertebrates**

4

5 **Authors**

6 Christian Scherer<sup>1</sup>, Nicole Brennholt<sup>2</sup>, Georg Reifferscheid<sup>2</sup>, Martin Wagner<sup>1,3</sup>

7 <sup>1</sup>Goethe University Frankfurt/ Main, Department Aquatic Ecotoxicology, Max-von-Laue-  
8 Strasse 13, D-60323 Frankfurt/ Main, Germany

9 <sup>2</sup>Federal Institute of Hydrology, Department Biochemistry and Ecotoxicology, Am Mainzer  
10 Tor 1, D-56002 Koblenz, Germany

11 <sup>3</sup>Norwegian University of Science and Technology, Department of Biology, Høgskoleringen  
12 5, Realfagbygget, NO-7491 Trondheim, Norway.

13 **Corresponding Author**

14 E-mail: [c.scherer@bio.uni-frankfurt.de](mailto:c.scherer@bio.uni-frankfurt.de)

15

16

18 **Ingestion studies**

19 **Table S1: Results of the non-parametric analysis of the ingestion rates for *Daphnia***  
 20 ***magna*, *Chironomus riparius*, *Gammarus pulex* and *Physella acuta*.** Significant influences  
 21 (n.s. = not significant, ★ =  $p < 0.05$ , ★★ =  $p < 0.01$ , ★★★ =  $p < 0.001$ ) of the variables size  
 22 (1, 10 and 90  $\mu\text{m}$ ), additional natural particles (with and without) and organisms were solely  
 23 analysed for ingestion rates at 300 P  $\text{mL}^{-1}$ .

|                |                        |                                  | <i>D. magna</i>         | <i>C. riparius</i>                       | <i>G. pulex</i>         | <i>P. acuta</i>                             |                      |             |
|----------------|------------------------|----------------------------------|-------------------------|------------------------------------------|-------------------------|---------------------------------------------|----------------------|-------------|
| Add. particles | Size [ $\mu\text{m}$ ] | Analysed c [P $\text{mL}^{-1}$ ] | Significant differences | Significant differences                  | Significant differences | Significant differences                     |                      |             |
| Concentration  | Without (-)            | 1                                | 3                       | n.s.                                     | n.s.                    | n.s.                                        | vs 3000★★★           |             |
|                |                        |                                  | 30                      | vs 3000 ★★★                              | vs 3000 ★★              | vs 3000 ★                                   | vs 3000 ★            |             |
|                |                        |                                  | 300                     | n.s.                                     | vs 3000 ★               | n.s.                                        | vs 3 ★               |             |
|                |                        |                                  | 3000                    | n.s.                                     | n.s.                    | n.s.                                        | n.s.                 |             |
|                | Without (-)            | 10                               | 3                       | 3                                        | n.s.                    | n.s.                                        | n.s.                 | vs 3000 ★★★ |
|                |                        |                                  |                         | 30                                       | vs 3000 ★★★             | vs 3000 ★★★                                 | n.s.                 | vs 3000 ★★  |
|                |                        |                                  |                         | 300                                      | n.s.                    | n.s.                                        | vs 3000 ★            | n.s.        |
|                |                        |                                  |                         | 3000                                     | n.s.                    | n.s.                                        | n.s.                 | n.s.        |
|                | Without (-)            | 90                               | 3                       | 3                                        | n.s.                    | n.s.                                        | n.s.                 | vs 300★     |
|                |                        |                                  |                         | 30                                       | n.s.                    | n.s.                                        | n.s.                 | n.s.        |
|                |                        |                                  |                         | 300                                      | n.s.                    | n.s.                                        | n.s.                 | n.s.        |
|                |                        |                                  |                         | 3000                                     | n.s.                    | n.s.                                        | n.s.                 | n.s.        |
| With (+)       | 1                      | 3                                | 3                       | n.s.                                     | n.s.                    | n.s.                                        | -/-                  |             |
|                |                        |                                  | 30                      | n.s.                                     | vs 3000 ★★              | vs 3000 ★★                                  | -/-                  |             |
|                |                        |                                  | 300                     | n.s.                                     | vs 3000 ★               | n.s.                                        | -/-                  |             |
|                |                        |                                  | 3000                    | n.s.                                     | n.s.                    | n.s.                                        | -/-                  |             |
| With (+)       | 10                     | 3                                | 3                       | n.s.                                     | n.s.                    | n.s.                                        | -/-                  |             |
|                |                        |                                  | 30                      | n.s.                                     | n.s.                    | n.s.                                        | -/-                  |             |
|                |                        |                                  | 300                     | n.s.                                     | n.s.                    | n.s.                                        | -/-                  |             |
|                |                        |                                  | 3000                    | n.s.                                     | n.s.                    | n.s.                                        | -/-                  |             |
| With (+)       | 90                     | 3                                | 3                       | n.s.                                     | n.s.                    | n.s.                                        | -/-                  |             |
|                |                        |                                  | 30                      | n.s.                                     | n.s.                    | n.s.                                        | -/-                  |             |
|                |                        |                                  | 300                     | n.s.                                     | n.s.                    | n.s.                                        | -/-                  |             |
|                |                        |                                  | 3000                    | n.s.                                     | n.s.                    | n.s.                                        | -/-                  |             |
| Add. particles | (-) vs (+)             | 1                                | 300                     | ★                                        | ★★                      | n.s.                                        | -/-                  |             |
|                |                        | 10                               | 300                     | ★★                                       | ★★                      | n.s.                                        | -/-                  |             |
|                |                        | 90                               | 300                     | n.s.                                     | n.s.                    | n.s.                                        | -/-                  |             |
| Size           | Without (-)            | 1 vs 10 vs 90                    | 300                     | n.s.                                     | 10 vs 90 ★★             | n.s.                                        | 1 vs 90 ★            |             |
|                | With (+)               | 1 vs 10 vs 90                    | 300                     | 1 vs 10★                                 | 1 vs 10 ★★              | n.s.                                        | -/-                  |             |
| Organism       | Without (-)            | 1                                | 300                     | <i>G. pulex</i> ★★★<br><i>P. acuta</i> ★ | n.s.                    | <i>D. magna</i> ★★★                         | <i>D. magna</i> ★    |             |
|                | Without (-)            | 10                               | 300                     | <i>G. pulex</i> ★★★                      | <i>G. pulex</i> ★       | <i>C. riparius</i> ★<br><i>D. magna</i> ★★★ | n.s.                 |             |
|                | Without (-)            | 90                               | 300                     | n.s.                                     | <i>P. acuta</i> ★       | n.s.                                        | <i>C. riparius</i> ★ |             |
|                | With (+)               | 1                                | 300                     | <i>C. riparius</i> ★★                    | <i>D. magna</i> ★★      | n.s.                                        | n.s.                 |             |
|                | With (+)               | 10                               | 300                     | <i>G. pulex</i> ★★                       | n.s.                    | <i>D. magna</i> ★★                          | n.s.                 |             |
|                | With (+)               | 90                               | 300                     | n.s.                                     | n.s.                    | n.s.                                        | n.s.                 |             |

24 **Table S2: Results of the ingestion studies with *Daphnia magna*, *Chironomus riparius*, *Gammarus pulex* and *Physella acuta*.** Mean  $\pm$  standard  
 25 deviation (ingested particles), min/ max values for ingested particles (min; max) and number of bead containing specimens (specs. cont. p, %).

| Without additional particles (-)        |                 | 1 $\mu\text{m}$         |                          |                           |                            | 10 $\mu\text{m}$        |                          |                           |                            | 90 $\mu\text{m}$        |                          |                           |
|-----------------------------------------|-----------------|-------------------------|--------------------------|---------------------------|----------------------------|-------------------------|--------------------------|---------------------------|----------------------------|-------------------------|--------------------------|---------------------------|
|                                         |                 | 3 [P mL <sup>-1</sup> ] | 30 [P mL <sup>-1</sup> ] | 300 [P mL <sup>-1</sup> ] | 3000 [P mL <sup>-1</sup> ] | 3 [P mL <sup>-1</sup> ] | 30 [P mL <sup>-1</sup> ] | 300 [P mL <sup>-1</sup> ] | 3000 [P mL <sup>-1</sup> ] | 3 [P mL <sup>-1</sup> ] | 30 [P mL <sup>-1</sup> ] | 300 [P mL <sup>-1</sup> ] |
| <i>Daphnia magna</i>                    | ing. particles: | 0 P                     | 4.6 $\pm$ 2.6 P          | 31.6 $\pm$ 18.1 P         | 147.6 $\pm$ 26.6 P         | 1 $\pm$ 0.62 P          | 4.17 $\pm$ 2.98 P        | 26.5 $\pm$ 7.45 P         | 152.3 $\pm$ 35.4 P         | 0 P                     | 0 P                      | 0 P                       |
|                                         | specs. cont. P: | 0 %                     | 100%                     | 100%                      | 100 %                      | 83.3%                   | 100%                     | 100%                      | 100%                       | 0 %                     | 0 %                      | 0 %                       |
|                                         | min; max:       | 0; 0                    | 3; 10                    | 3; 51                     | 120; 197                   | 0; 2                    | 2; 10                    | 15; 36                    | 103; 206                   | 0; 0                    | 0; 0                     | 0; 0                      |
| <i>Chironomus riparius</i>              | ing. particles: | 0.17 $\pm$ 0.41 P       | 0.3 $\pm$ 0.51 P         | 15.7 $\pm$ 10.24 P        | 47 $\pm$ 12.9 P            | 1.17 $\pm$ 1.17 P       | 10.3 $\pm$ 12.1 P        | 95.8 $\pm$ 38.2 P         | 531.2 $\pm$ 110.4 P        | 0.5 $\pm$ 1.21 P        | 0.5 $\pm$ 0.84 P         | 1 $\pm$ 0.88 P            |
|                                         | specs. cont. P: | 16.6%                   | 33.3%                    | 100%                      | 100%                       | 66.6%                   | 100%                     | 100%                      | 100%                       | 16.6%                   | 33.3%                    | 66.6%                     |
|                                         | min; max:       | 0; 1                    | 0; 1                     | 6; 32                     | 39; 62                     | 0; 3                    | 4; 35                    | 53; 156                   | 418; 680                   | 0; 3                    | 0; 2                     | 0; 2                      |
| <i>Gammarus pulex</i>                   | ing. particles: | 0 P                     | 0.67 $\pm$ 0.82 P        | 3.17 $\pm$ 1.82 P         | 6.17 $\pm$ 2.23 P          | 0 P                     | 0 P                      | 3 $\pm$ 4.1 P             | 13.17 $\pm$ 11.9 P         | 0.16 $\pm$ 0.41 P       | 3.33 $\pm$ 3.43 P        | 8.17 $\pm$ 11.9 P         |
|                                         | specs. cont. P: | 0%                      | 50%                      | 100%                      | 100%                       | 0%                      | 0%                       | 100 %                     | 100%                       | 16.6%                   | 83.3%                    | 100%                      |
|                                         | min; max:       | 0; 0                    | 0; 2                     | 1; 6                      | 3; 9                       | 0; 0                    | 0; 0                     | 1; 12                     | 8; 36                      | 0; 1                    | 0; 10                    | 1; 32                     |
| <i>Physella acuta</i>                   | ing. particles: | 19.2 $\pm$ 6.21 P       | 66.2 $\pm$ 20.4 P        | 86.2 $\pm$ 16.2 P         | 830 $\pm$ 145 P            | 36.2 $\pm$ 19.1 P       | 62 $\pm$ 27.2 P          | 459 $\pm$ 73.6 P          | 2496 $\pm$ 247 P           | 4 $\pm$ 0.88 P          | 37.5 $\pm$ 14.5 P        | 641 $\pm$ 174 P           |
|                                         | specs. cont. P: | 100%                    | 100%                     | 100%                      | 100%                       | 100%                    | 100%                     | 100%                      | 100%                       | 100%                    | 100%                     | 100%                      |
|                                         | min; max:       | 10; 29                  | 43; 104                  | 72; 113                   | 671; 993                   | 13; 64                  | 34; 114                  | 393; 594                  | 2079; 2841                 | 3; 5                    | 25; 56                   | 376; 816                  |
| <i>Lumbriculus variegatus</i>           | ing. particles: | 0 P                     | 0 P                      | 0.83 $\pm$ 2.04 P         | 0 P                        | 0 P                     | 1.16 $\pm$ 2.85 P        | 3 $\pm$ 9.79 P            | 0 P                        | 0.3 $\pm$ 0.81 P        | 0 P                      | 0 P                       |
|                                         | specs. cont. P: | 0 %                     | 0 %                      | 16.6%                     | 0 %                        | 0 %                     | 16.6%                    | 16.6%                     | 0 %                        | 16.6%                   | 0 %                      | 0 %                       |
|                                         | min; max:       | 0; 0                    | 0; 0                     | 0; 5                      | 0; 0                       | 0; 0                    | 0; 7                     | 0; 24                     | 0; 0                       | 0; 2                    | 0; 0                     | 0; 0                      |
| With additional particles (+)           |                 | 1 $\mu\text{m}$         |                          |                           |                            | 10 $\mu\text{m}$        |                          |                           |                            | 90 $\mu\text{m}$        |                          |                           |
|                                         |                 | 3 [P mL <sup>-1</sup> ] | 30 [P mL <sup>-1</sup> ] | 300 [P mL <sup>-1</sup> ] | 3000 [P mL <sup>-1</sup> ] | 3 [P mL <sup>-1</sup> ] | 30 [P mL <sup>-1</sup> ] | 300 [P mL <sup>-1</sup> ] | 3000 [P mL <sup>-1</sup> ] | 3 [P mL <sup>-1</sup> ] | 30 [P mL <sup>-1</sup> ] | 300 [P mL <sup>-1</sup> ] |
| <i>Daphnia magna</i><br>+ algae         | ing. particles: | 0.16 $\pm$ 0.41 P       | 0.6 $\pm$ 0.82 P         | 4.33 $\pm$ 3.01 P         | 20.5 $\pm$ 12.63 P         | 0.3 $\pm$ 0.52 P        | 2 $\pm$ 1.66 P           | 10.83 $\pm$ 6.40 P        | 89.3 $\pm$ 48.1 P          | 0 P                     | 0 P                      | 0 P                       |
|                                         | specs. cont. P: | 16.6 %                  | 50%                      | 100%                      | 100 %                      | 33.3%                   | 83.3%                    | 100%                      | 100%                       | 0 %                     | 0 %                      | 0 %                       |
|                                         | min; max:       | 0; 1                    | 0; 2                     | 2; 10                     | 3; 40                      | 0; 1                    | 0; 4                     | 3; 20                     | 30; 151                    | 0; 0                    | 0; 0                     | 0; 0                      |
| <i>Chironomus riparius</i><br>+ sand    | ing. particles: | 0 P                     | 0.5 $\pm$ 0.55 P         | 1.6 $\pm$ 0.82 P          | 9.82 $\pm$ 5.42 P          | 0 P                     | 1.5 $\pm$ 1.86 P         | 14.5 $\pm$ 7.64 P         | 68.3 $\pm$ 31.67 P         | 0 P                     | 0.16 $\pm$ 0.41 P        | 0.67 $\pm$ 1.62 P         |
|                                         | specs. cont. P: | 0%                      | 50%                      | 100%                      | 100%                       | 0%                      | 66.6%                    | 100%                      | 100%                       | 0%                      | 16.6%                    | 16.6%                     |
|                                         | min; max:       | 0; 0                    | 0; 1                     | 1; 3                      | 5; 20                      | 0; 0                    | 0; 5                     | 3; 23                     | 35; 122                    | 0; 0                    | 0; 1                     | 0; 4                      |
| <i>Gammarus pulex</i><br>+ leaf         | ing. particles: | 0 P                     | 0.83 $\pm$ 0.74 P        | 3.67 $\pm$ 1.21 P         | 7.3 $\pm$ 4.93 P           | 0 P                     | 0 P                      | 1.3 $\pm$ 1.37 P          | 6.67 $\pm$ 6.22 P          | 0.17 $\pm$ 0.41 P       | 1.82 $\pm$ 3.53 P        | 1.67 $\pm$ 3.13 P         |
|                                         | specs. cont. P: | 0%                      | 66.6%                    | 100%                      | 100%                       | 0%                      | 0%                       | 66.6 %                    | 100%                       | 16.6%                   | 50%                      | 50%                       |
|                                         | min; max:       | 0; 0                    | 0; 2                     | 2; 5                      | 3; 14                      | 0; 0                    | 0; 0                     | 0; 3                      | 1; 16                      | 0; 1                    | 0; 9                     | 0; 8                      |
| <i>Lumbriculus variegatus</i><br>+ sand | ing. particles: | 0 P                     | 0 P                      | 0 P                       | 3.33 $\pm$ 8.15 P          | 0.66 $\pm$ 1.62 P       | 0 P                      | 0 P                       | 5.5 $\pm$ 13.46 P          | 0 P                     | 0.3 $\pm$ 0.82 P         | 0.16 P                    |
|                                         | specs. cont. P: | 0 %                     | 0 %                      | 0%                        | 16.6%                      | 16.6 %                  | 0%                       | 0%                        | 16.6 %                     | 0%                      | 16.6 %                   | 16.6 %                    |
|                                         | min; max:       | 0; 0                    | 0; 0                     | 0; 0                      | 0; 20                      | 0; 4                    | 0; 0                     | 0; 0                      | 0; 33                      | 0; 0                    | 0; 2                     | 0; 1                      |

## 26 **Egestion experiments**

### 27 *Material and Methods*

28 *Daphnia magna*. For every time interval ( $t_0$ - $t_{11}$ ) and bead size (1 and 10  $\mu\text{m}$ ), we exposed 5  
29 daphnids per replicate ( $n = 5$ ) to  $300 \text{ P mL}^{-1}$  fluorescent polystyrene spheres. After a 5 min  
30 exposure, the daphnids were washed for 1 min by transferring them to particle-free M4  
31 medium. The daphnids were then transferred to fresh 50 mL M4 medium. After  $t_1 = 2$  min,  $t_2$   
32  $= 4$  min,  $t_3 = 8$  min,  $t_4 = 16$  min,  $t_5 = 32$  min,  $t_6 = 64$  min,  $t_7 = 128$  min,  $t_8 = 256$  min,  $t_9 =$   
33  $512$  min,  $t_{10} = 1\,440$  min and  $t_{11} = 2\,880$  min we removed the daphnids and sacrificed them  
34 for microscopic examination. The ingestion of polystyrene spheres was verified by analysing  
35 the gut content of  $t_0$  daphnids. To evaluate the impact of algae on the gut evacuation period of  
36 microplastics, we added  $10^6$  cells  $\text{mL}^{-1}$  per treatment. In a second study, we exposed daphnids  
37 to 10  $\mu\text{m}$  polystyrene particles ( $300 \text{ P mL}^{-1}$ ) and documented the evacuation process via live  
38 imaging. For this, after a feeding period of 5 min, 10 daphnids were washed and transferred  
39 individually in multiwall plates containing fresh M4 medium and analysed using fluorescence  
40 microscopy after 2, 6, 14, 30, 60, 126 and 254 min.

41 *Chironomus riparius*. We exposed aquatic larvae of *C. riparius* to 10  $\mu\text{m}$  ( $3000 \text{ P mL}^{-1}$ ) and  
42 90  $\mu\text{m}$  ( $300 \text{ P mL}^{-1}$ ) polystyrene spheres each. After a 3 h exposure period, the larvae were  
43 examined using fluorescent microscopy. Only larvae that ingested microplastics were used for  
44 the egestion studies. To prevent re-ingestion of egested particles, we transferred them  
45 individually ( $n = 6$ ) to cages made of stainless steel gauze (mesh size of 0.5 mm). These cages  
46 were placed into 100 mL beakers filled with 50 mL M4 medium. Thus, faeces could pass the  
47 mesh and sink to the bottom of the beakers, while the larvae remained in the cages. After 0.5,  
48 1, 1.5, 2, 2.5, 3, 12, 24 and 48 h the larvae were examined using fluorescent microscopy.  
49 Specimens containing polystyrene spheres were transferred back into the cages. To evaluate

50 the impact of food on the gut evacuation period of microplastics, we added a tip of a spatula  
51 of ground TetraMin fish food.

## 52 *Results*

53 Daphnids exposed to algae during the egestion period, completely egested the polystyrene  
54 beads within 128 min for the 10  $\mu\text{m}$  spheres and 1 140 min for 1  $\mu\text{m}$  polystyrene spheres  
55 (Fig.S1 a-b). This point to a slower egestion of 1  $\mu\text{m}$  compared to 10  $\mu\text{m}$  particles. In the  
56 absence of algae cells, the amount of bead containing individuals remained steady (Fig. S1 a-  
57 b). Re-ingestion of egested particles as well as slower gut evacuation processes seems likely.  
58 Observations and real-time tracking via live imaging support these assumptions (Fig. S1 c-d).  
59 Without algae, the gut clearance was slowed down and a re-ingestion of egested particles was  
60 observed frequently.

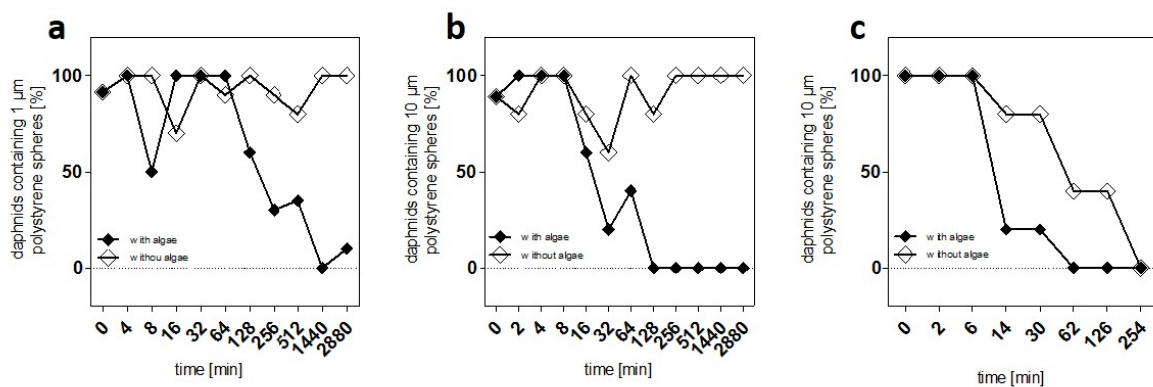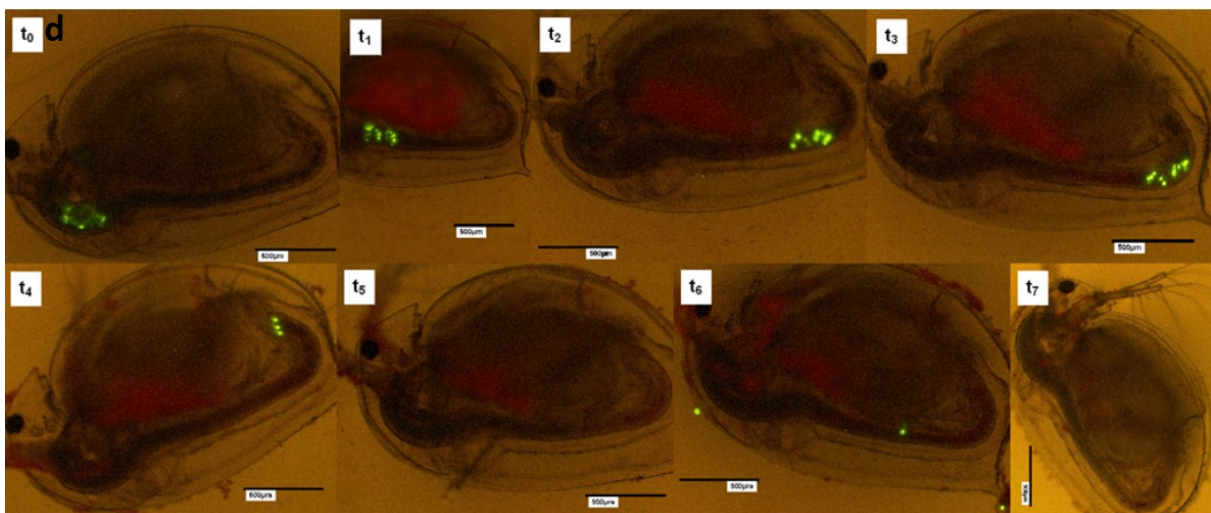

62 **Figure S1: Egestion experiment with *Daphnia magna* and fluorescent polystyrene beads.**  
63 (a-c) Ratio of daphnids containing beads in their gastrointestinal tract (%) at specific time  
64 points for 1  $\mu\text{m}$  beads (a) and 10  $\mu\text{m}$  beads (b-c). The results from the live imaging (c, d). Re-  
65 ingested particles (d,  $t_0$ ) were excluded in (c).

66 In the egestion experiments with *C. riparius*, larvae co-exposed to food had a slightly faster  
67 gut clearance compared to individuals exposed to microplastics only (Fig. S2). Within the  
68 first 3 h the larvae only excreted a few beads located at the near end of the gastrointestinal  
69 tract. A complete clearance was not been observed. Overall, 90  $\mu\text{m}$  polystyrene beads were  
70 egested faster than 10  $\mu\text{m}$  beads. However, despite the cages, we cannot completely exclude a  
71 re-ingestion of faeces.

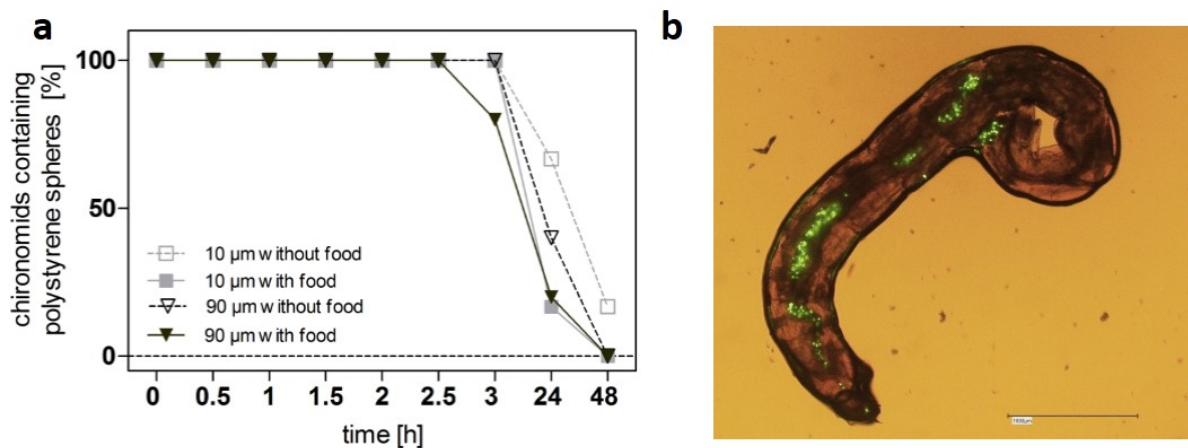

72

73 **Figure S2: Egestion experiment with aquatic larvae of *Chironomus riparius* and**  
74 **fluorescent polystyrene spheres.** (a) Ratio of larvae containing 10 and 90  $\mu\text{m}$  beads at  
75 specific time points in the presence and absence of food. (b) Larva after 3 h depuration  
76 (10  $\mu\text{m}$ ).

77

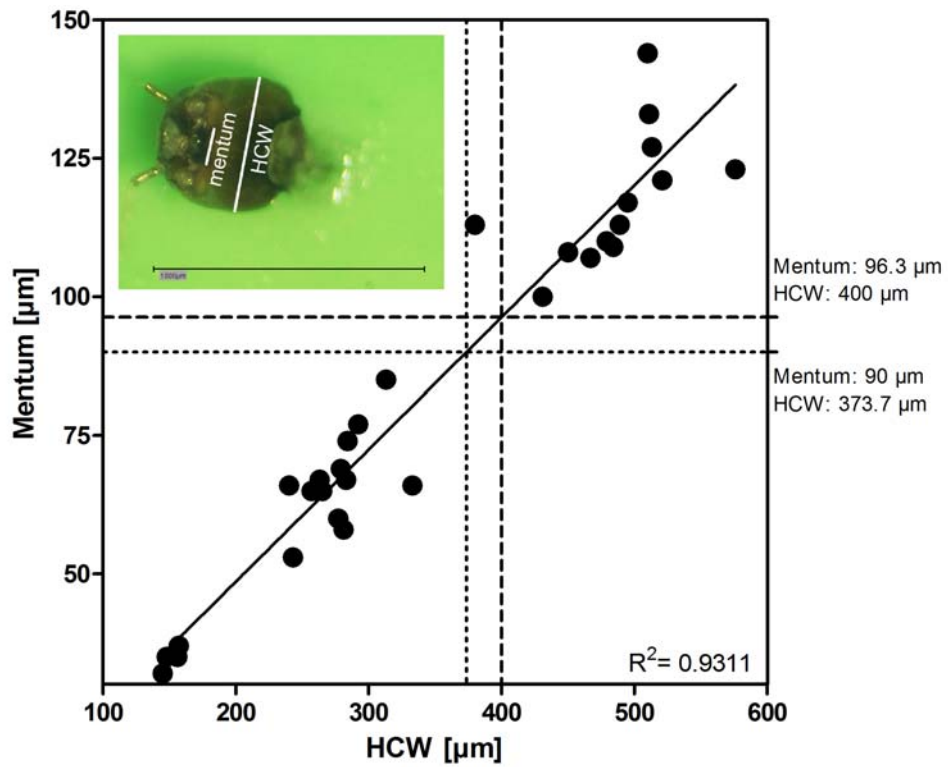

78

79 **Figure S3: Correlation ( $r^2 = 0.9311$ ) of head capsule (HCW) and mentum width of 30**  
 80 **analysed *Chironomus riparius* larvae (unexposed controls).** Dotted lines represent  
 81 morphological restrictions, whereas only individuals with HCWs >400 μm and mentum width  
 82 >96.3 μm have the theoretically capacity to ingest 90 μm polystyrene spheres.
